# Supplementary material for: Reversible and irreversible stimuli-responsive chromism of a square-planar platinum(ii) salt
Source: Royal Society of Chemistry journal article supplement (doi:10.1039/d3ra03554a), 2023-01-01
Supplement: d3ra03554a1.pdf [file d3ra03554a1.pdf]

## Electronic Supplementary Information

### Reversible and irreversible stimuli-responsive chromism of a square-planar platinum(II) salt

Depeng Li<sup>a</sup>, Qingqing Guan<sup>a</sup>, Xiaoyun Hu<sup>a</sup>, Yuhong Su<sup>a\*</sup>, Zhen Su<sup>a\*</sup>

Key Laboratory of Oil and Gas Fine Chemicals Ministry of Education, College of Chemical Engineering, Xinjiang University, Urumqi 830017, China.

\* Corresponding authors: Zhen Su. E-mail: zhensu@xju.edu.cn

Yuhong Su. E-mail: suyuhong@xju.edu.cn

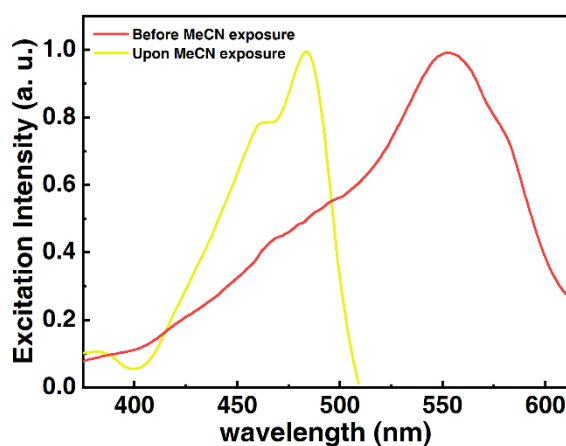

Fig. S1 Changes in excitation spectra before and after 1OCN·OTf·H<sub>2</sub>O contact with MeCN.

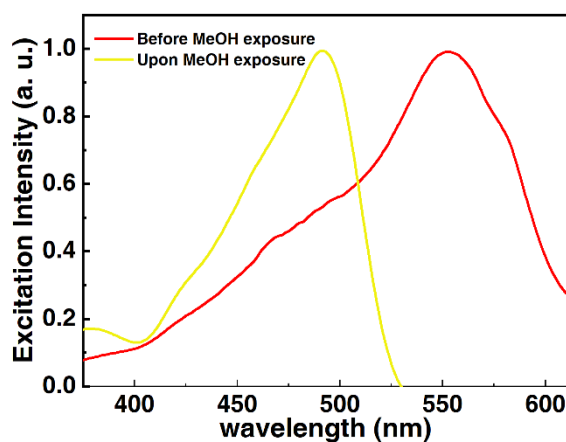

Fig. S2 Changes in excitation spectra before and after 1OCN·OTf·H<sub>2</sub>O contact with MeOH.

Table. S1 Colorimetric and photographs of  $10\text{CN}\cdot\text{OTf}\cdot\text{H}_2\text{O}$  after contact with various organic chemical solutions

| Organic chemical solvent | Colorimetric       | Images                                                                               |
|--------------------------|--------------------|--------------------------------------------------------------------------------------|
| Acetonitrile             | From red to yellow |    |
| Methanol                 | From red to yellow |    |
| Ethanol                  | Constant           |    |
| Carbon dichloride        | Constant           |    |
| Carbon tetrachloride     | Constant           |    |
| N-hexane                 | Constant           |    |
| Cyclohexane              | Constant           |    |
| Acetone                  | Constant           |    |
| DMF                      | Dissolution        |    |
| DMSO                     | Dissolution        |    |
| THF                      | Constant           |    |
| Petroleum ether          | Constant           |    |
| Ethyl ether              | Constant           |    |
| Ethyl acetate            | Constant           |   |
| Acetaldehyde             | Constant           |  |
| Formaldehyde             | Constant           |  |
| Butyl cyanide            | Constant           |  |
| N-Butyronitrile          | Constant           |  |

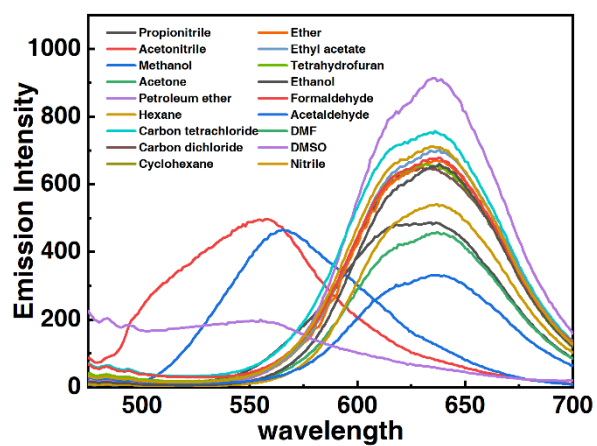

Fig. S3 Emission selectivity of  $10\text{CN}\cdot\text{OTf}\cdot\text{H}_2\text{O}$  to MeCN.

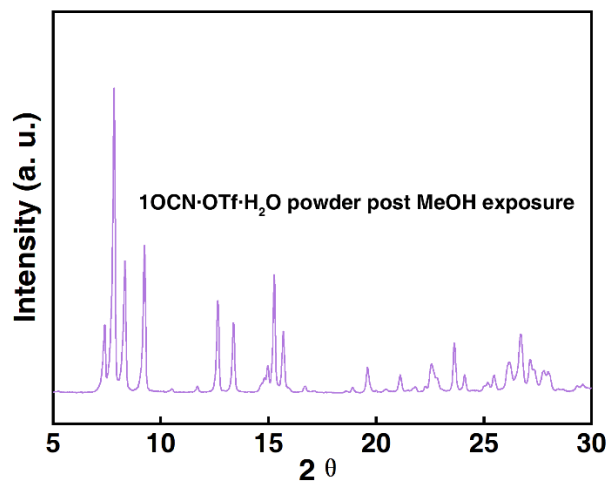

Fig. S4 XRD pattern of  $1\text{OCN}\cdot\text{OTf}\cdot\text{H}_2\text{O}$  upon MeOH exposure.

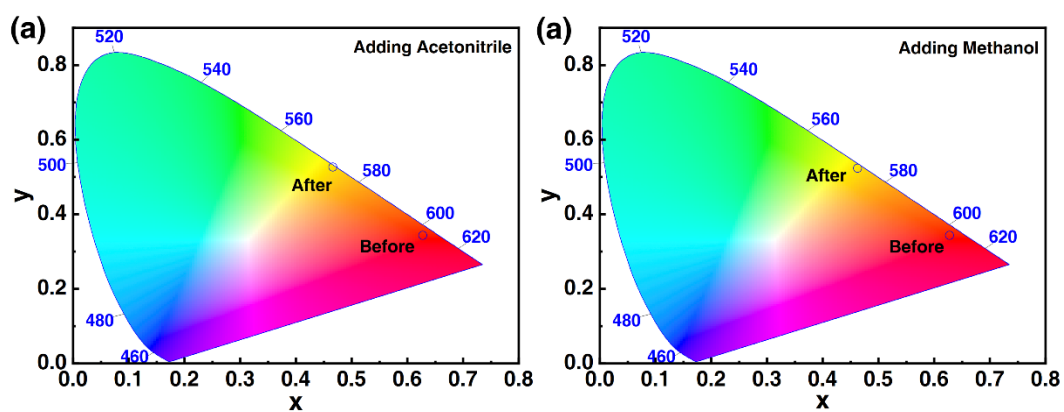

Fig. S5 (a)  $1\text{OCN}\cdot\text{OTf}\cdot\text{H}_2\text{O}$  phosphorescence CIE diagram before and after contact with MeCN, (b)  $1\text{OCN}\cdot\text{OTf}\cdot\text{H}_2\text{O}$  phosphorescence CIE diagram before and after contact with MeOH.

Table. S2: Crystal data and structure refinement for [Pt(tpy)OCN]·OTf·H<sub>2</sub>O.

| Compound                                    | [Pt(tpy)OCN]·OTf·H <sub>2</sub> O                                                  |
|---------------------------------------------|------------------------------------------------------------------------------------|
| Empirical formula                           | C <sub>17</sub> H <sub>12</sub> F <sub>3</sub> N <sub>4</sub> O <sub>4.5</sub> PtS |
| Formula weight                              | 628.46                                                                             |
| Temperature/K                               | 292.99(11)                                                                         |
| Crystal system                              | monoclinic                                                                         |
| Space group                                 | P2 <sub>1</sub> /c                                                                 |
| a/Å                                         | 6.78310(10)                                                                        |
| b/Å                                         | 23.8581(3)                                                                         |
| c/Å                                         | 23.5997(3)                                                                         |
| α/°                                         | 90                                                                                 |
| β/°                                         | 91.6080(10)                                                                        |
| γ/°                                         | 90                                                                                 |
| Volume/Å <sup>3</sup>                       | 3817.68(9)                                                                         |
| Z                                           | 8                                                                                  |
| ρ <sub>calc</sub> /g/cm <sup>3</sup>        | 2.187                                                                              |
| μ/mm <sup>-1</sup>                          | 15.394                                                                             |
| F(000)                                      | 2392.0                                                                             |
| Crystal size/mm <sup>3</sup>                | 0.13 × 0.1 × 0.08                                                                  |
| Radiation                                   | Cu Kα (λ = 1.54184)                                                                |
| 2θ range for data collection/°              | 5.268 to 143.418                                                                   |
| Index ranges                                | -6 ≤ h ≤ 8, -27 ≤ k ≤ 29, -28 ≤ l ≤ 28                                             |
| Reflections collected                       | 21395                                                                              |
| Independent reflections                     | 7263 [R <sub>int</sub> = 0.0413, R <sub>sigma</sub> = 0.0401]                      |
| Data/restraints/parameters                  | 7263/0/553                                                                         |
| Goodness-of-fit on F <sup>2</sup>           | 1.065                                                                              |
| Final R indexes [I >= 2σ (I)]               | R <sub>1</sub> = 0.0364, wR <sub>2</sub> = 0.1038                                  |
| Final R indexes [all data]                  | R <sub>1</sub> = 0.0406, wR <sub>2</sub> = 0.1063                                  |
| Largest diff. peak/hole / e Å <sup>-3</sup> | 0.71/-0.88                                                                         |

The obtained single crystals have been deposited at the Cambridge Crystallographic Data Centre and allocated the

deposition number: [Pt(tpy)OCN]·OTf·H<sub>2</sub>O (2263879).

Table. S3: Crystal data and structure refinement for [Pt(tpy)OCN]·OTf.

| Compound                                    | [Pt(tpy)OCN]·OTf                                                                 |
|---------------------------------------------|----------------------------------------------------------------------------------|
| Empirical formula                           | C <sub>17</sub> H <sub>11</sub> F <sub>3</sub> N <sub>4</sub> O <sub>4</sub> PtS |
| Formula weight                              | 619.45                                                                           |
| Temperature/K                               | 199.98(10)                                                                       |
| Crystal system                              | monoclinic                                                                       |
| Space group                                 | Cc                                                                               |
| a/Å                                         | 13.9994(10)                                                                      |
| b/Å                                         | 19.0666(15)                                                                      |
| c/Å                                         | 6.7719(5)                                                                        |
| α/°                                         | 90                                                                               |
| β/°                                         | 95.207(7)                                                                        |
| γ/°                                         | 90                                                                               |
| Volume/Å <sup>3</sup>                       | 1800.1(2)                                                                        |
| Z                                           | 4                                                                                |
| ρ <sub>calc</sub> /cm <sup>3</sup>          | 2.286                                                                            |
| μ/mm <sup>-1</sup>                          | 16.290                                                                           |
| F(000)                                      | 1176.0                                                                           |
| Crystal size/mm <sup>3</sup>                | 0.14 × 0.12 × 0.09                                                               |
| Radiation                                   | Cu Kα (λ = 1.54178)                                                              |
| 2θ range for data collection/°              | 7.856 to 143.866                                                                 |
| Index ranges                                | -17 ≤ h ≤ 17, -23 ≤ k ≤ 22, -8 ≤ l ≤ 7                                           |
| Reflections collected                       | 4075                                                                             |
| Independent reflections                     | 2008 [R <sub>int</sub> = 0.0331, R <sub>sigma</sub> = 0.0311]                    |
| Data/restraints/parameters                  | 2008/206/272                                                                     |
| Goodness-of-fit on F <sup>2</sup>           | 1.156                                                                            |
| Final R indexes [I >= 2σ (I)]               | R <sub>1</sub> = 0.0332, wR <sub>2</sub> = 0.0872                                |
| Final R indexes [all data]                  | R <sub>1</sub> = 0.0341, wR <sub>2</sub> = 0.0873                                |
| Largest diff. peak/hole / e Å <sup>-3</sup> | 1.19/-1.54                                                                       |
| Flack parameter                             | 0.477(15)                                                                        |

The obtained single crystals have been deposited at the Cambridge Crystallographic Data Centre and allocated the deposition number: [Pt(tpy)OCN]·OTf (2263889).

### Experimental

Single crystals of C<sub>17</sub>H<sub>11</sub>F<sub>3</sub>N<sub>4</sub>O<sub>4</sub>Pt were [Pt(tpy)OCN]·OTf. A suitable crystal was selected and [Pt(tpy)OCN]·OTf on a multiwire proportional diffractometer. The crystal was kept at 199.98(10) K during data collection. Using Olex2<sup>1</sup>, the structure was solved with the SHELXT<sup>2</sup> structure solution program using Intrinsic Phasing and refined with the SHELXL<sup>3</sup> refinement package using Least Squares minimisation.

1. Dolomanov, O.V., Bourhis, L.J., Gildea, R.J., Howard, J.A.K. & Puschmann, H. (2009), *J. Appl. Cryst.* **42**, 339-341.
2. Sheldrick, G.M. (2015). *Acta Cryst.* **A71**, 3-8.

3. Sheldrick, G.M. (2015). *Acta Cryst.* **C71**, 3-8.
